# Supplementary material for: Pinpointing novel risk loci for Lewy body dementia and the shared genetic etiology with Alzheimer’s disease and Parkinson’s disease: a large-scale multi-trait association analysis
Source: PubMed Central journal article supplement (PMC9214990; doi:10.1186/s12916-022-02404-2), 2022-06-22
Supplement: 12916_2022_2404_MOESM2_ESM.pdf [file 12916_2022_2404_MOESM2_ESM.pdf]

**Figs. S1-S13. Regional association plots of 13 genomic risk loci.**

The index SNP, which is the SNP with the smallest  $p$ -value in the genomic risk loci defined by FUMA, was indicated by a purple circle. The association of an individual variant is plotted as  $-\log_{10}(P \text{ value})$  against chromosomal position. The y axis shows the recombination rate estimated from 1000 Genomes Project EUR data. For each locus, from top to the bottom, the LocusZoom plot was derived from summary statistics of  $MTAG_{LBD}$ ,  $GWAS_{LBD}$ ,  $GWAS_{AD}$ , and  $GWAS_{PD}$ , respectively, with the genes located in this region presented.

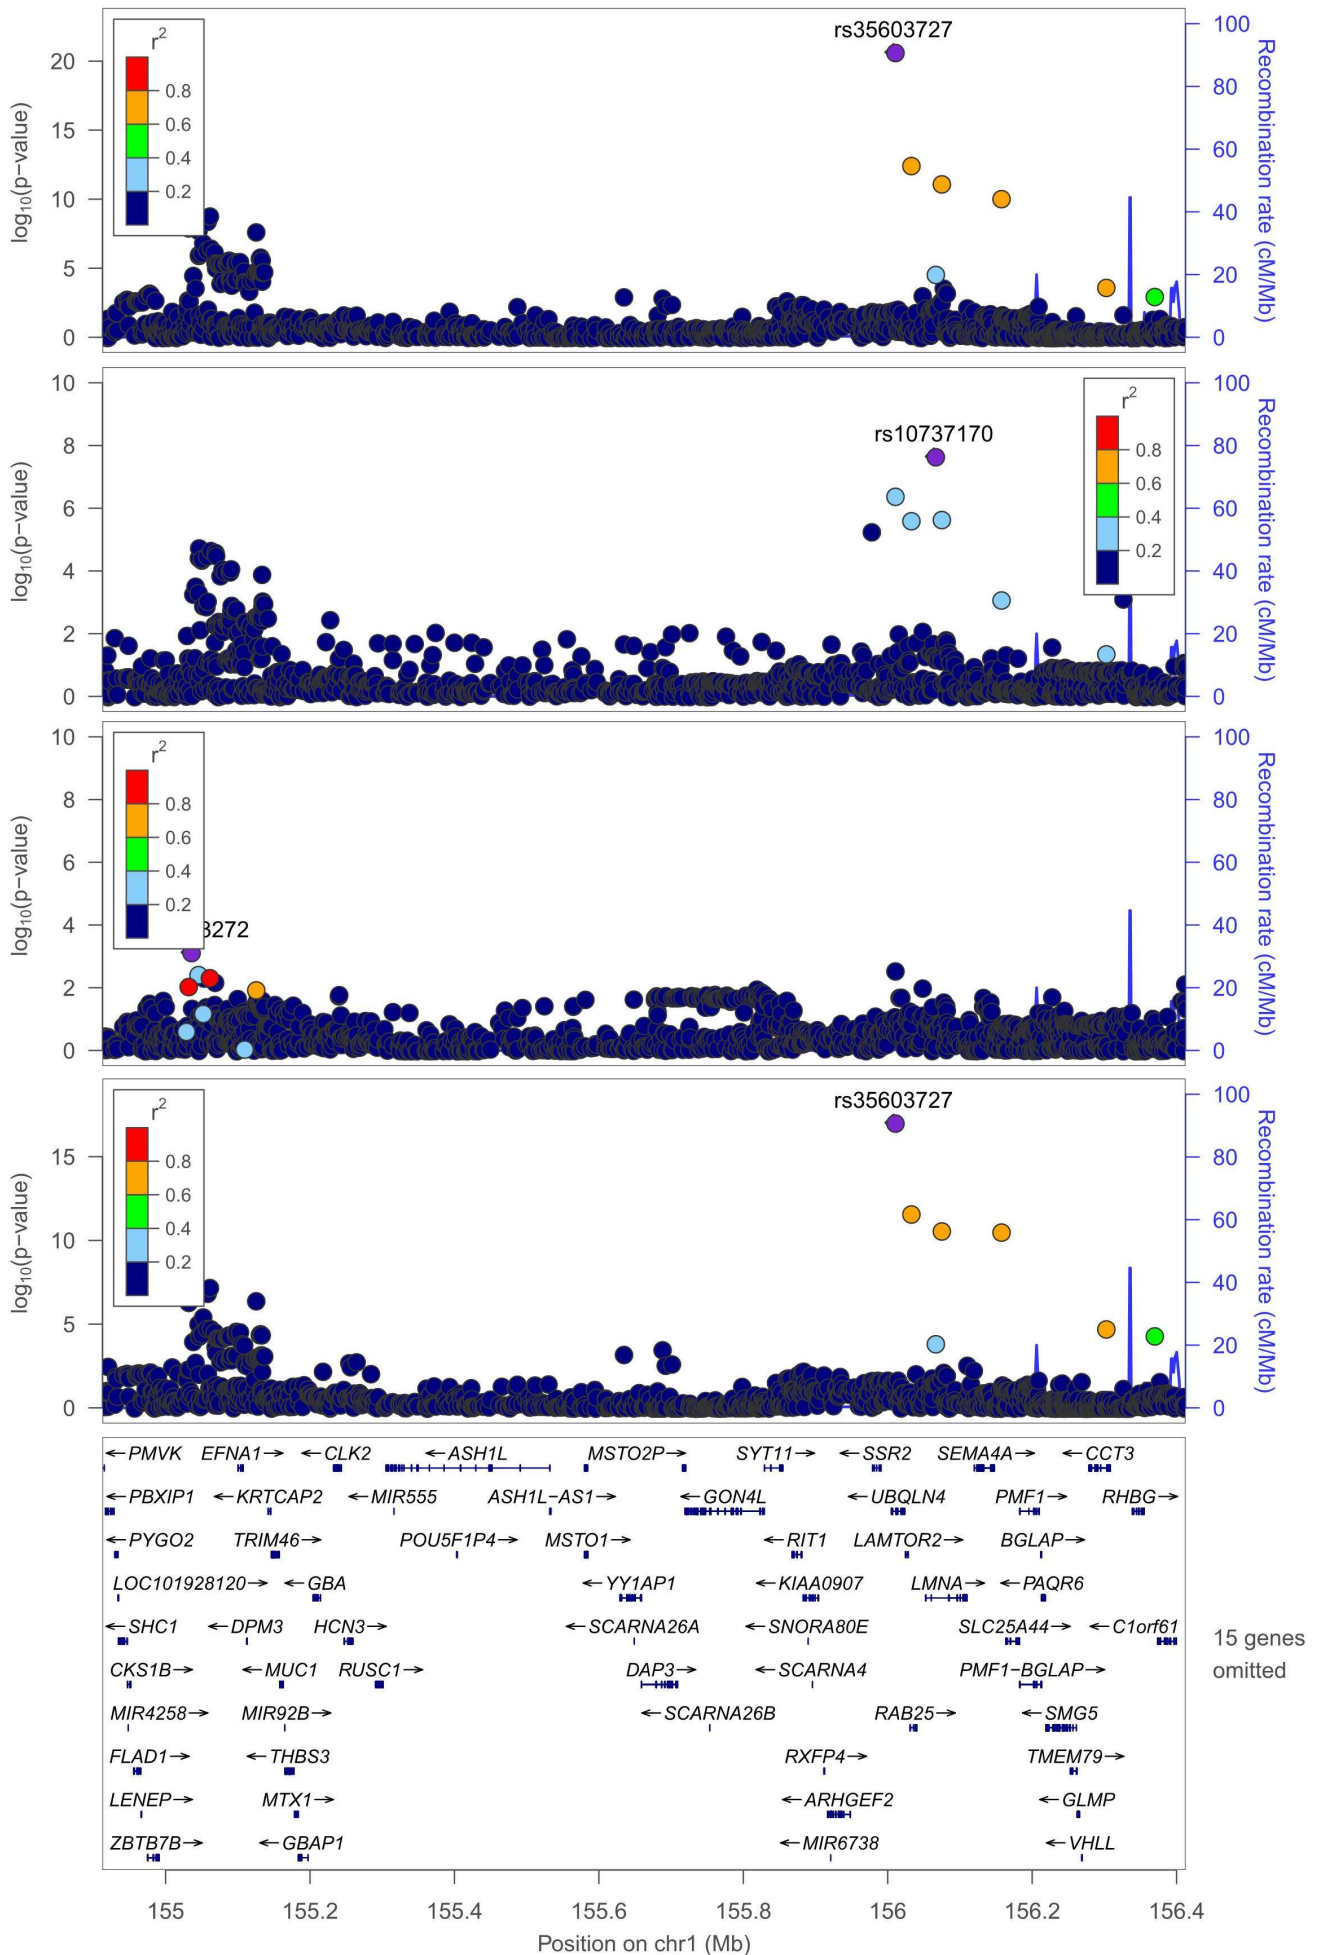

Fig. S1: The LocusZoom plot of genomic risk loci 1q22

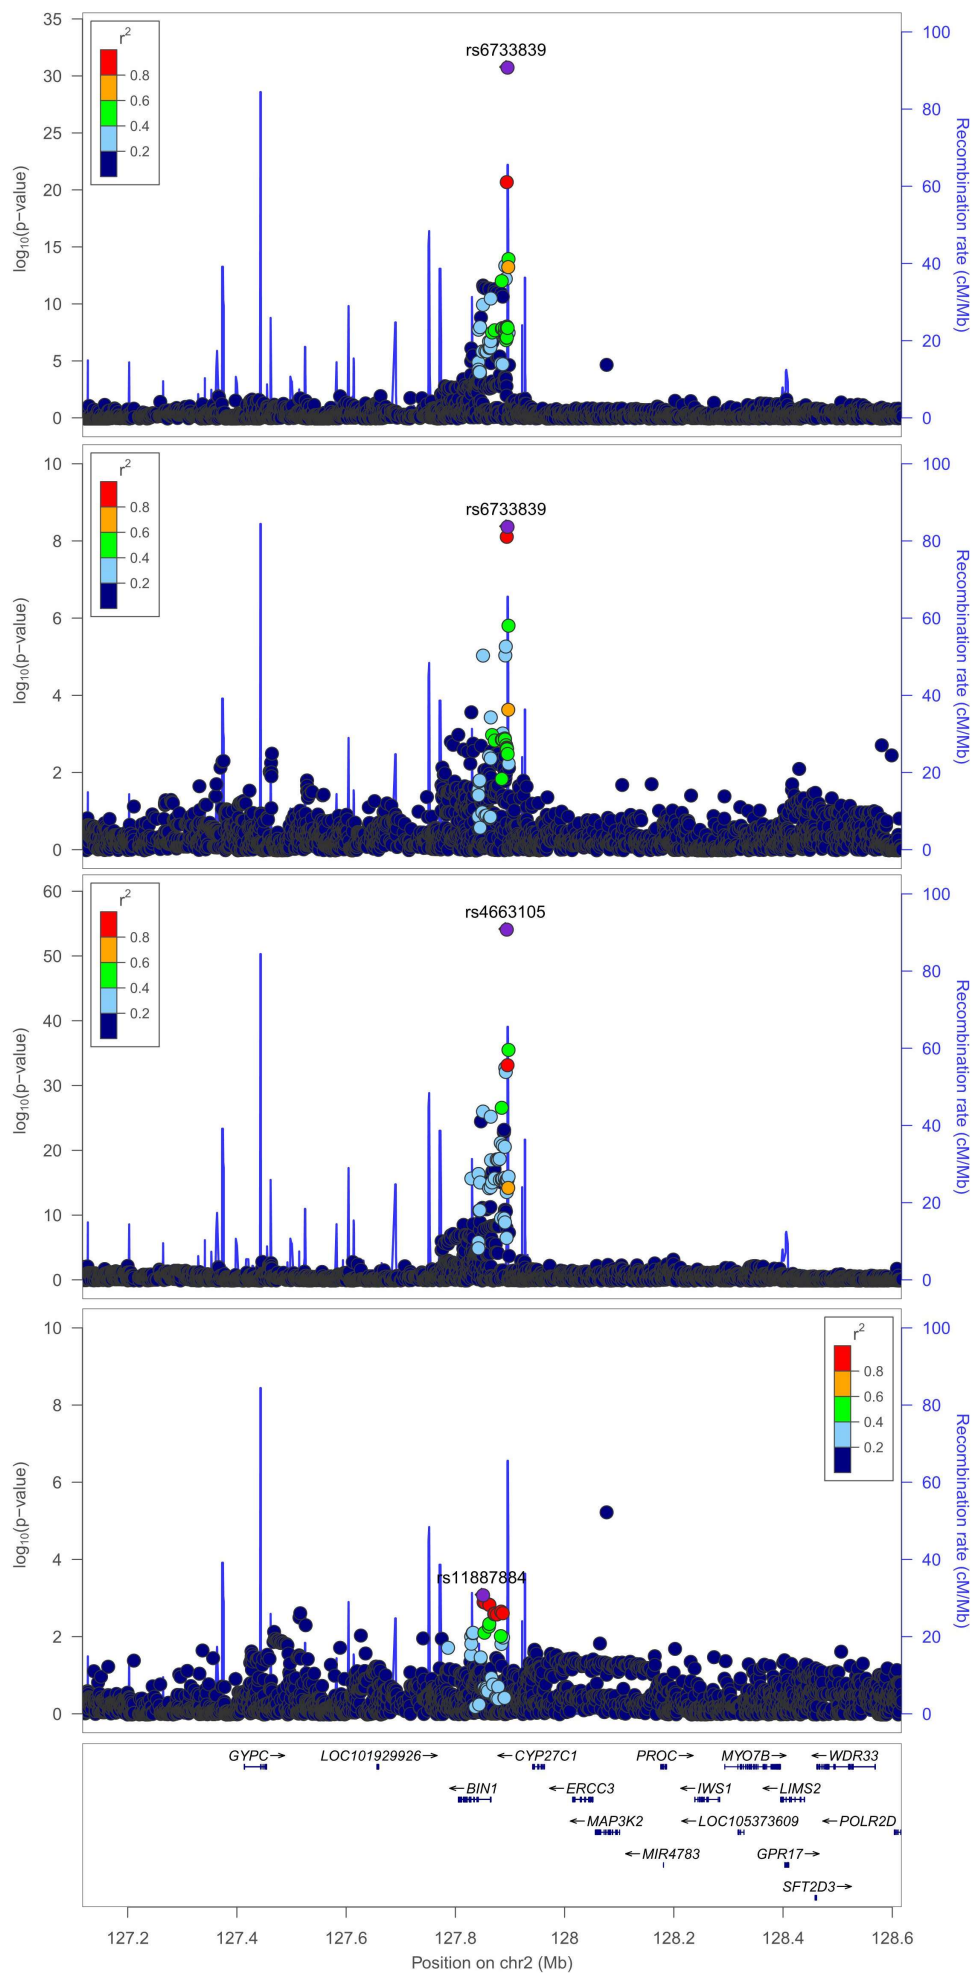

**Fig. S2: The LocusZoom plot of genomic risk loci 2q14.3**

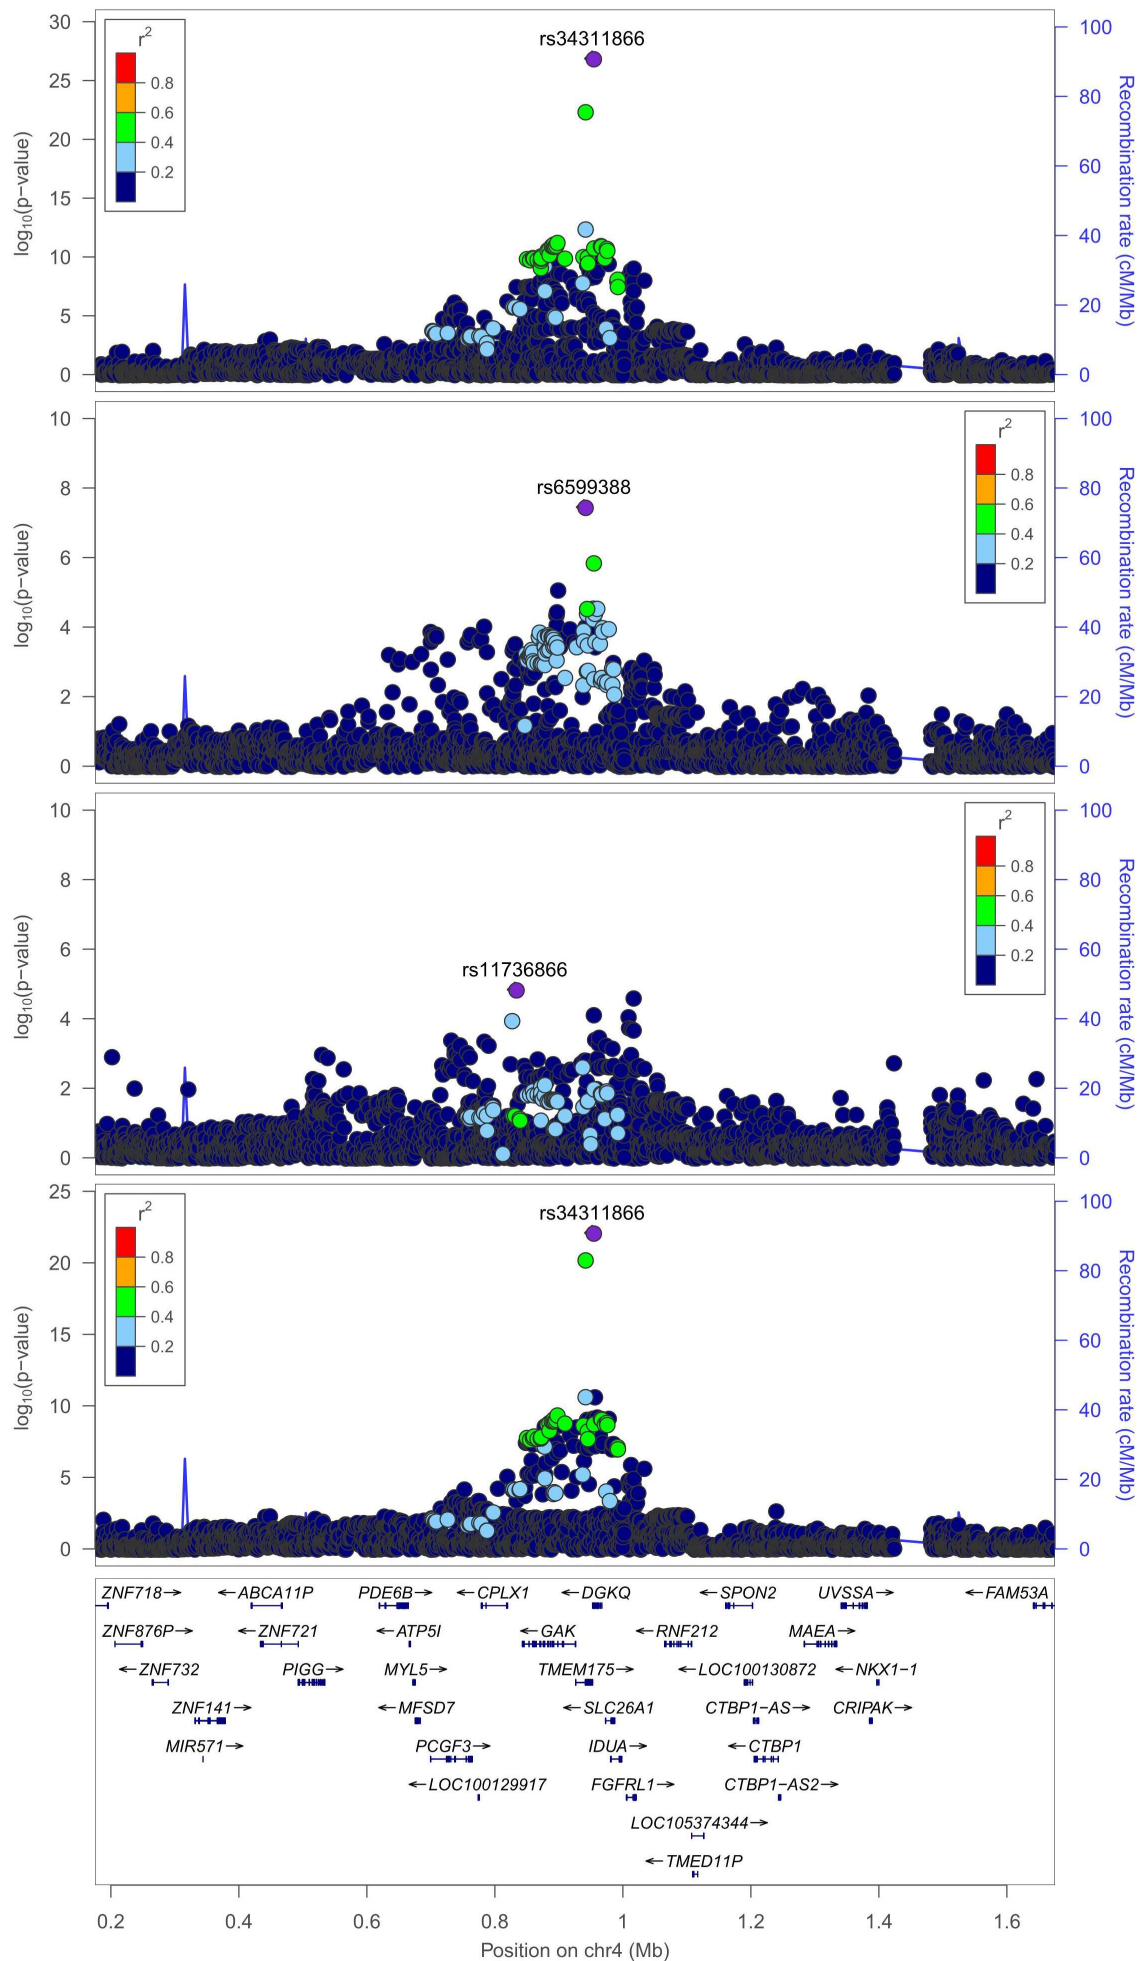

**Fig. S3: The LocusZoom plot of genomic risk loci 4p16.3**



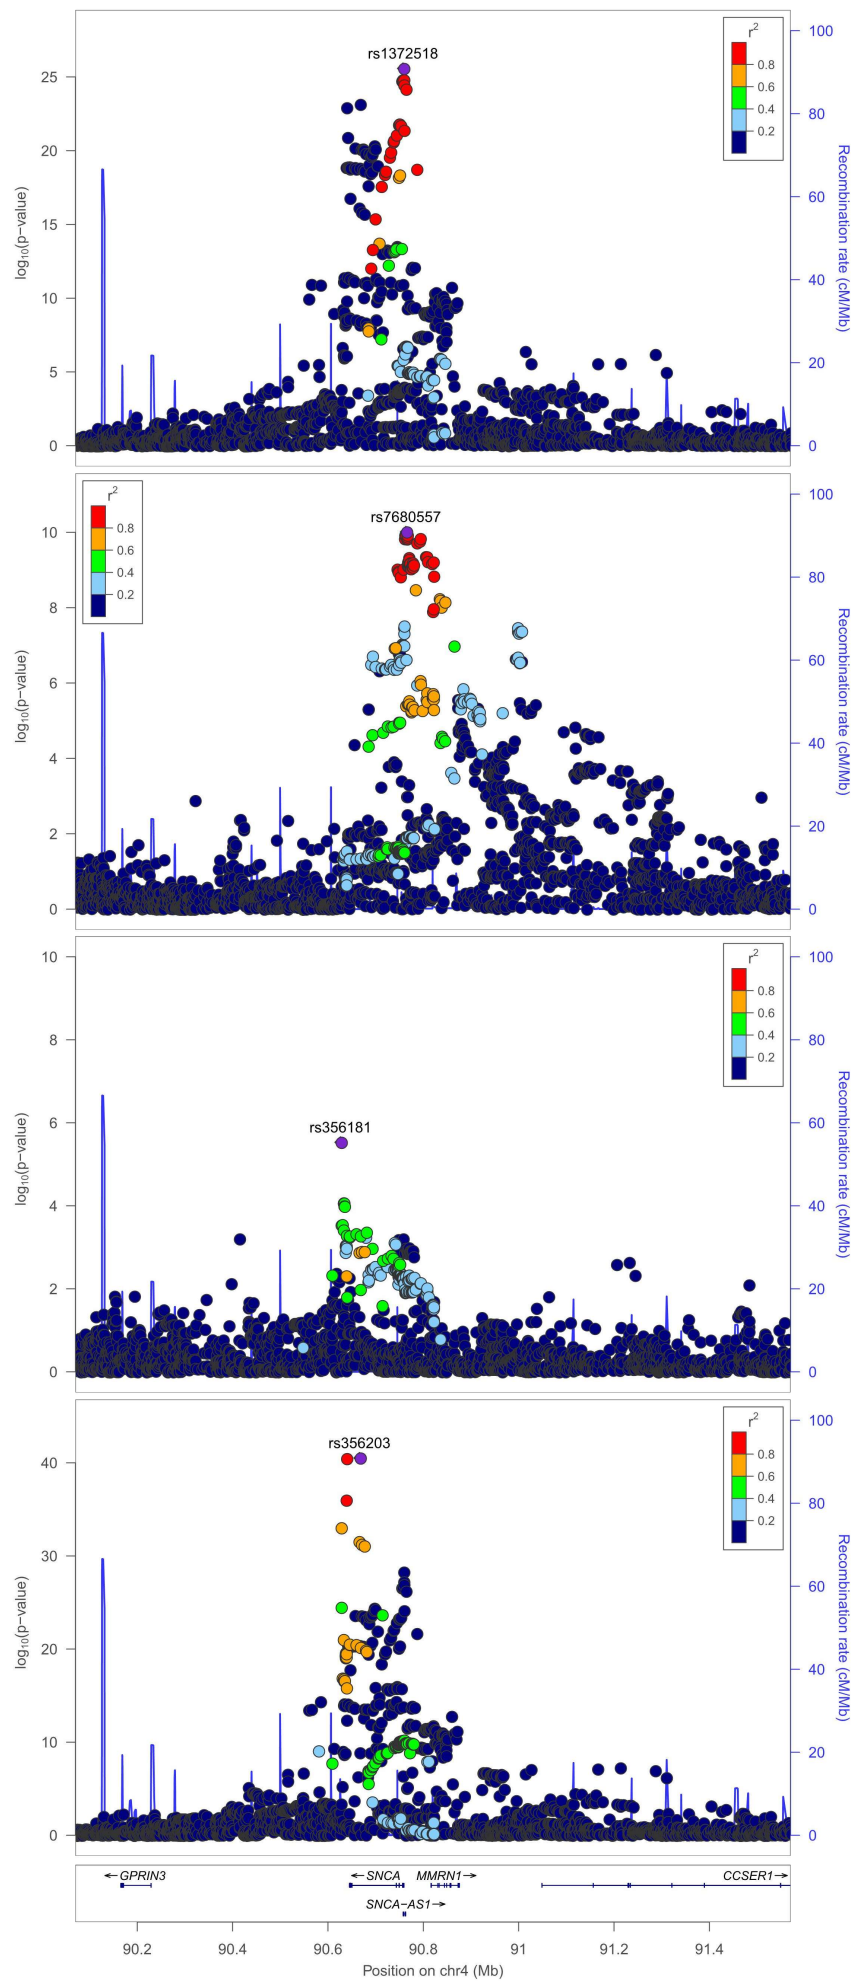

**Fig. S4: The LocusZoom plot of genomic risk loci 4q22.1**

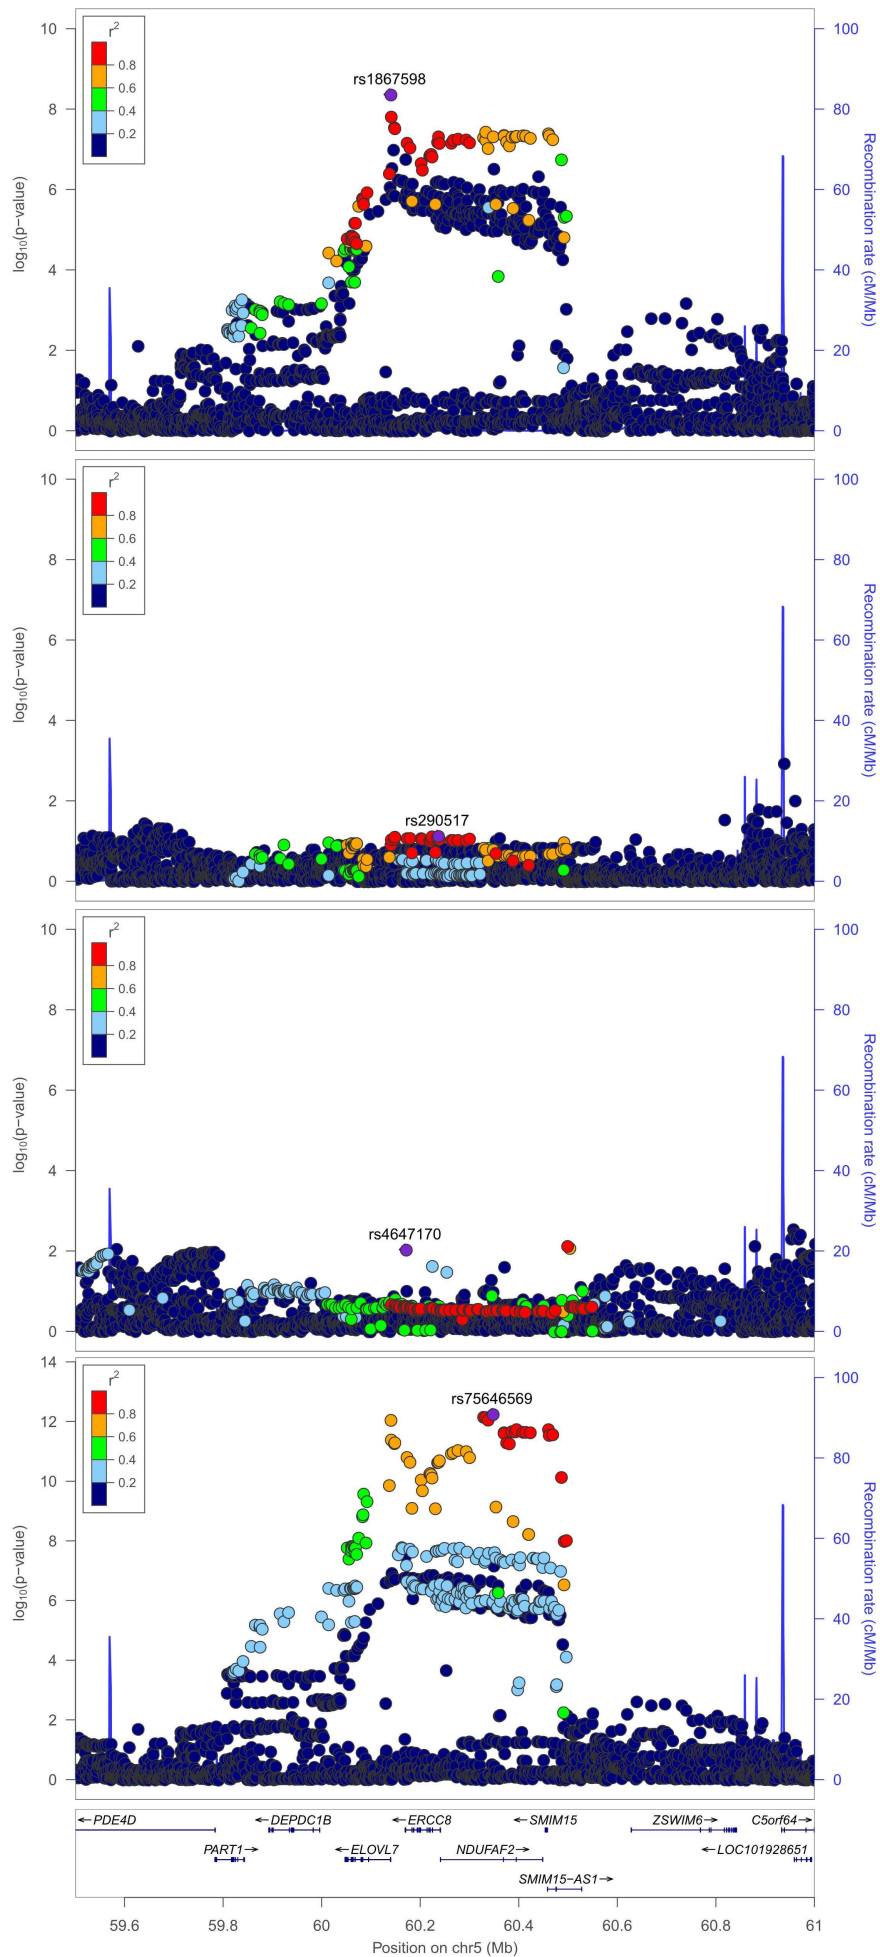

**Fig. S5: The LocusZoom plot of genomic risk loci 5q12.1**

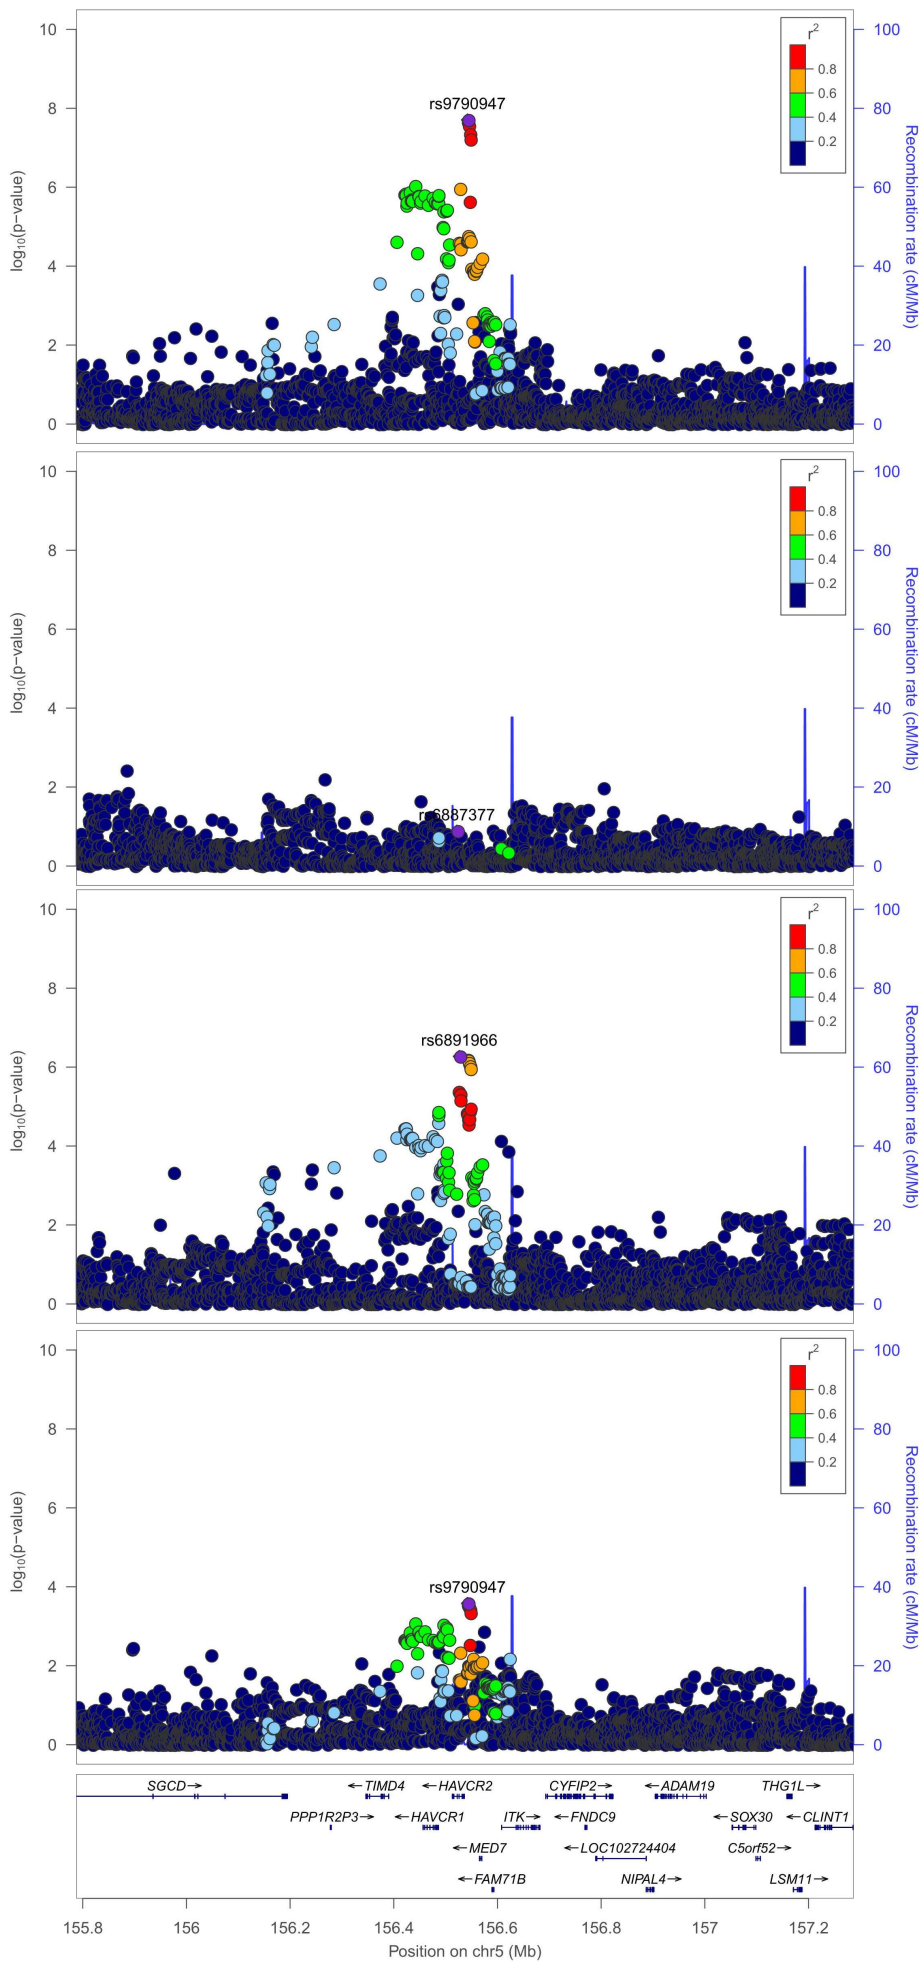

**Fig. S6: The LocusZoom plot of genomic risk loci 5q33.3**

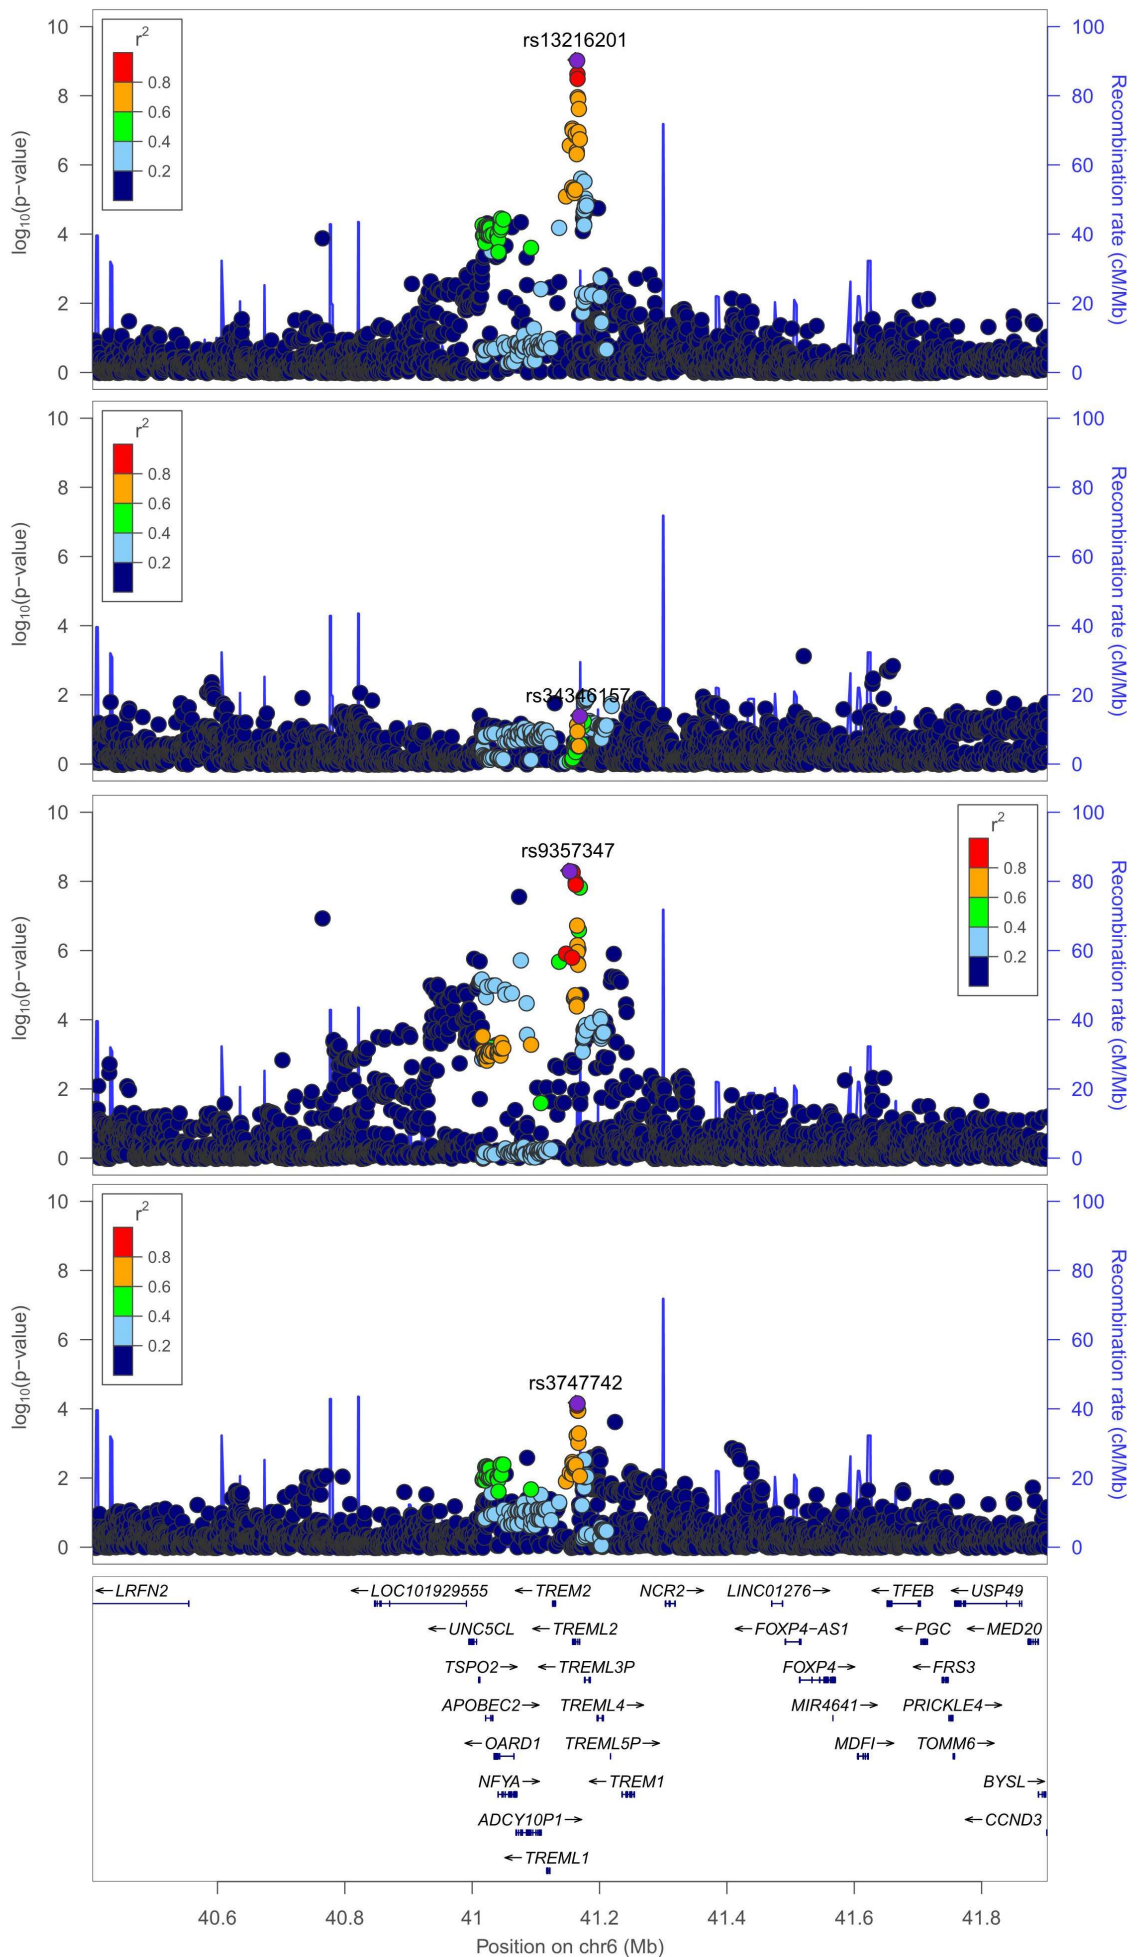

**Fig. S7: The LocusZoom plot of genomic risk loci 6p21.1**



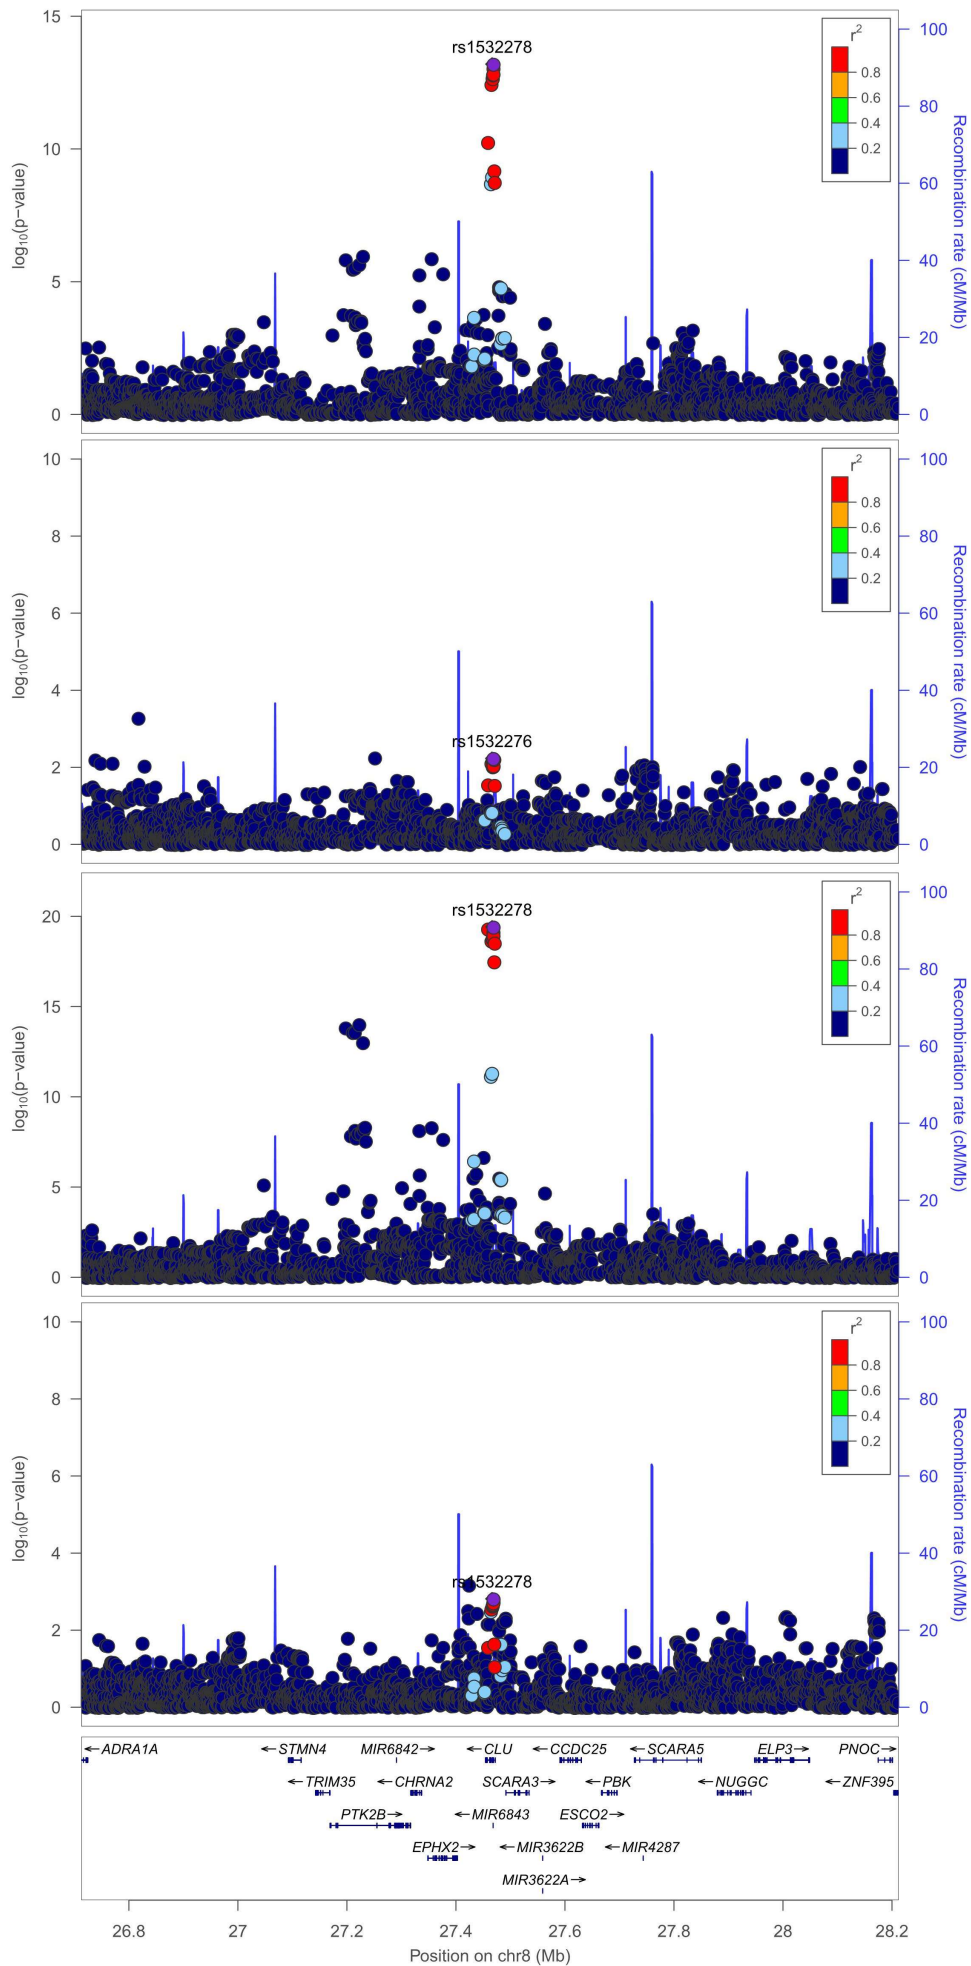

**Fig. S8: The LocusZoom plot of genomic risk loci 8p21.1**



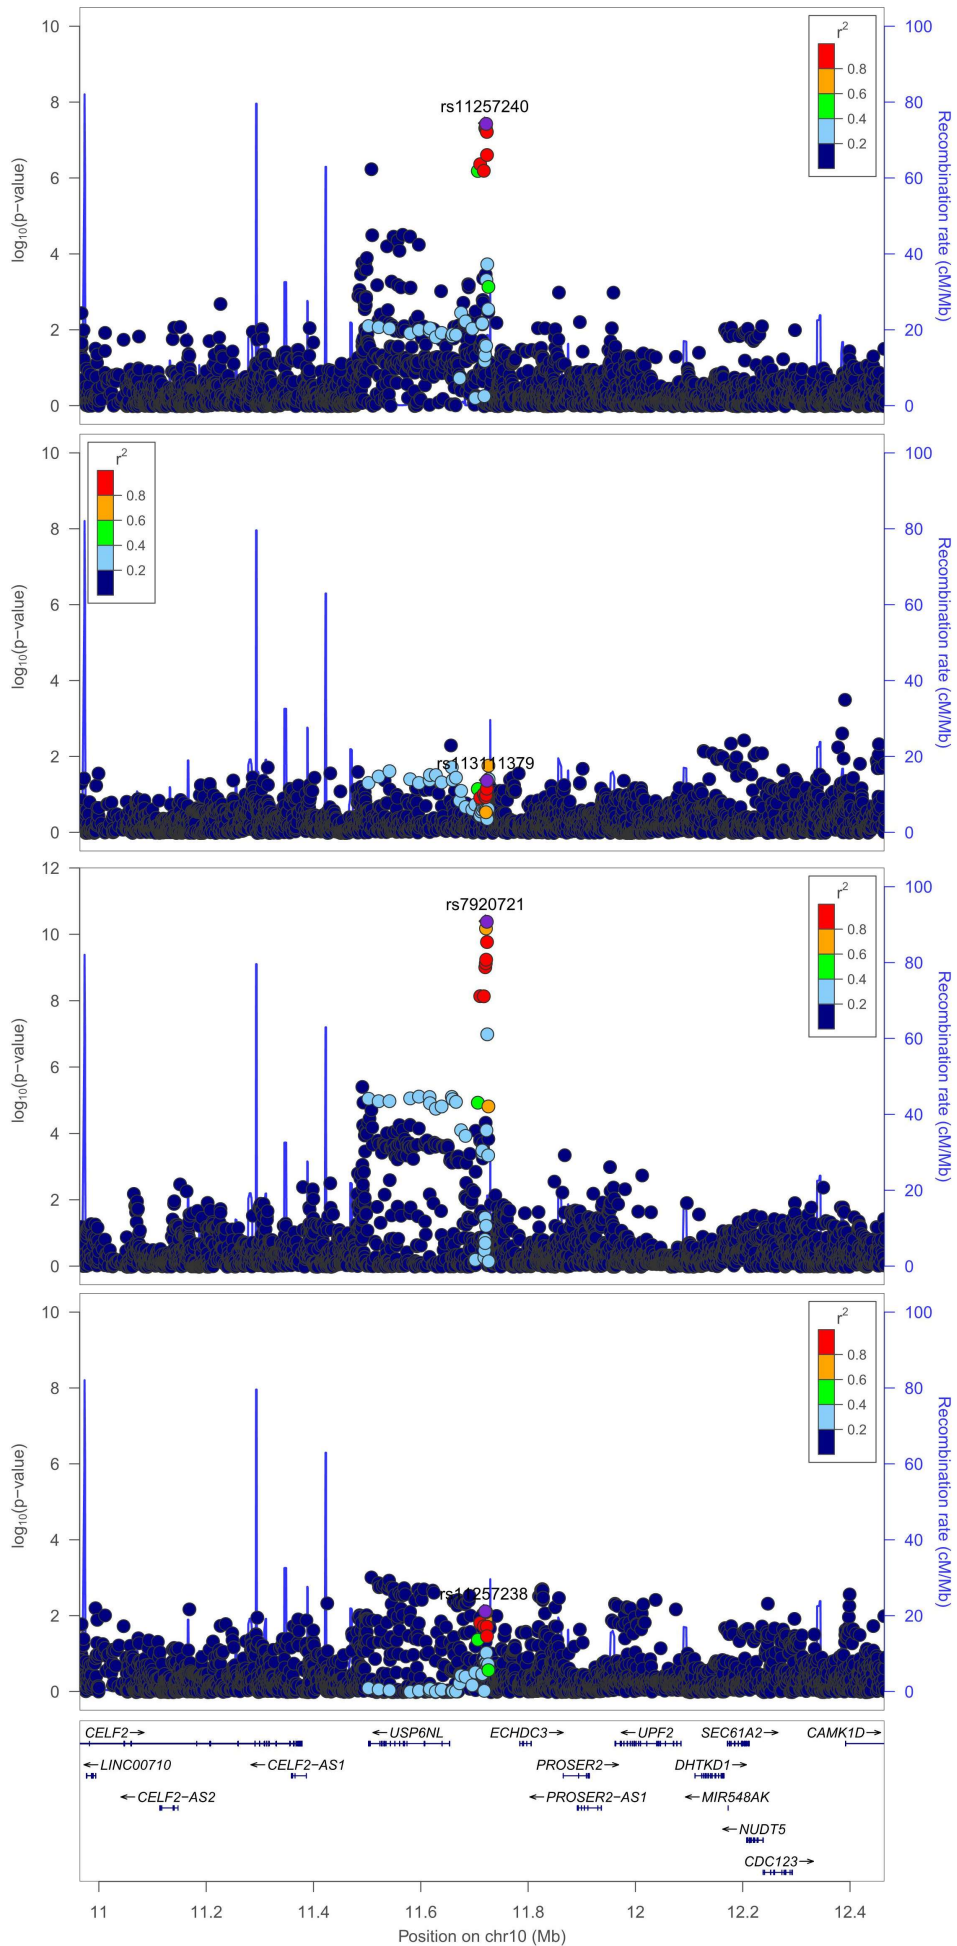

**Fig. S9: The LocusZoom plot of genomic risk loci 10p14**

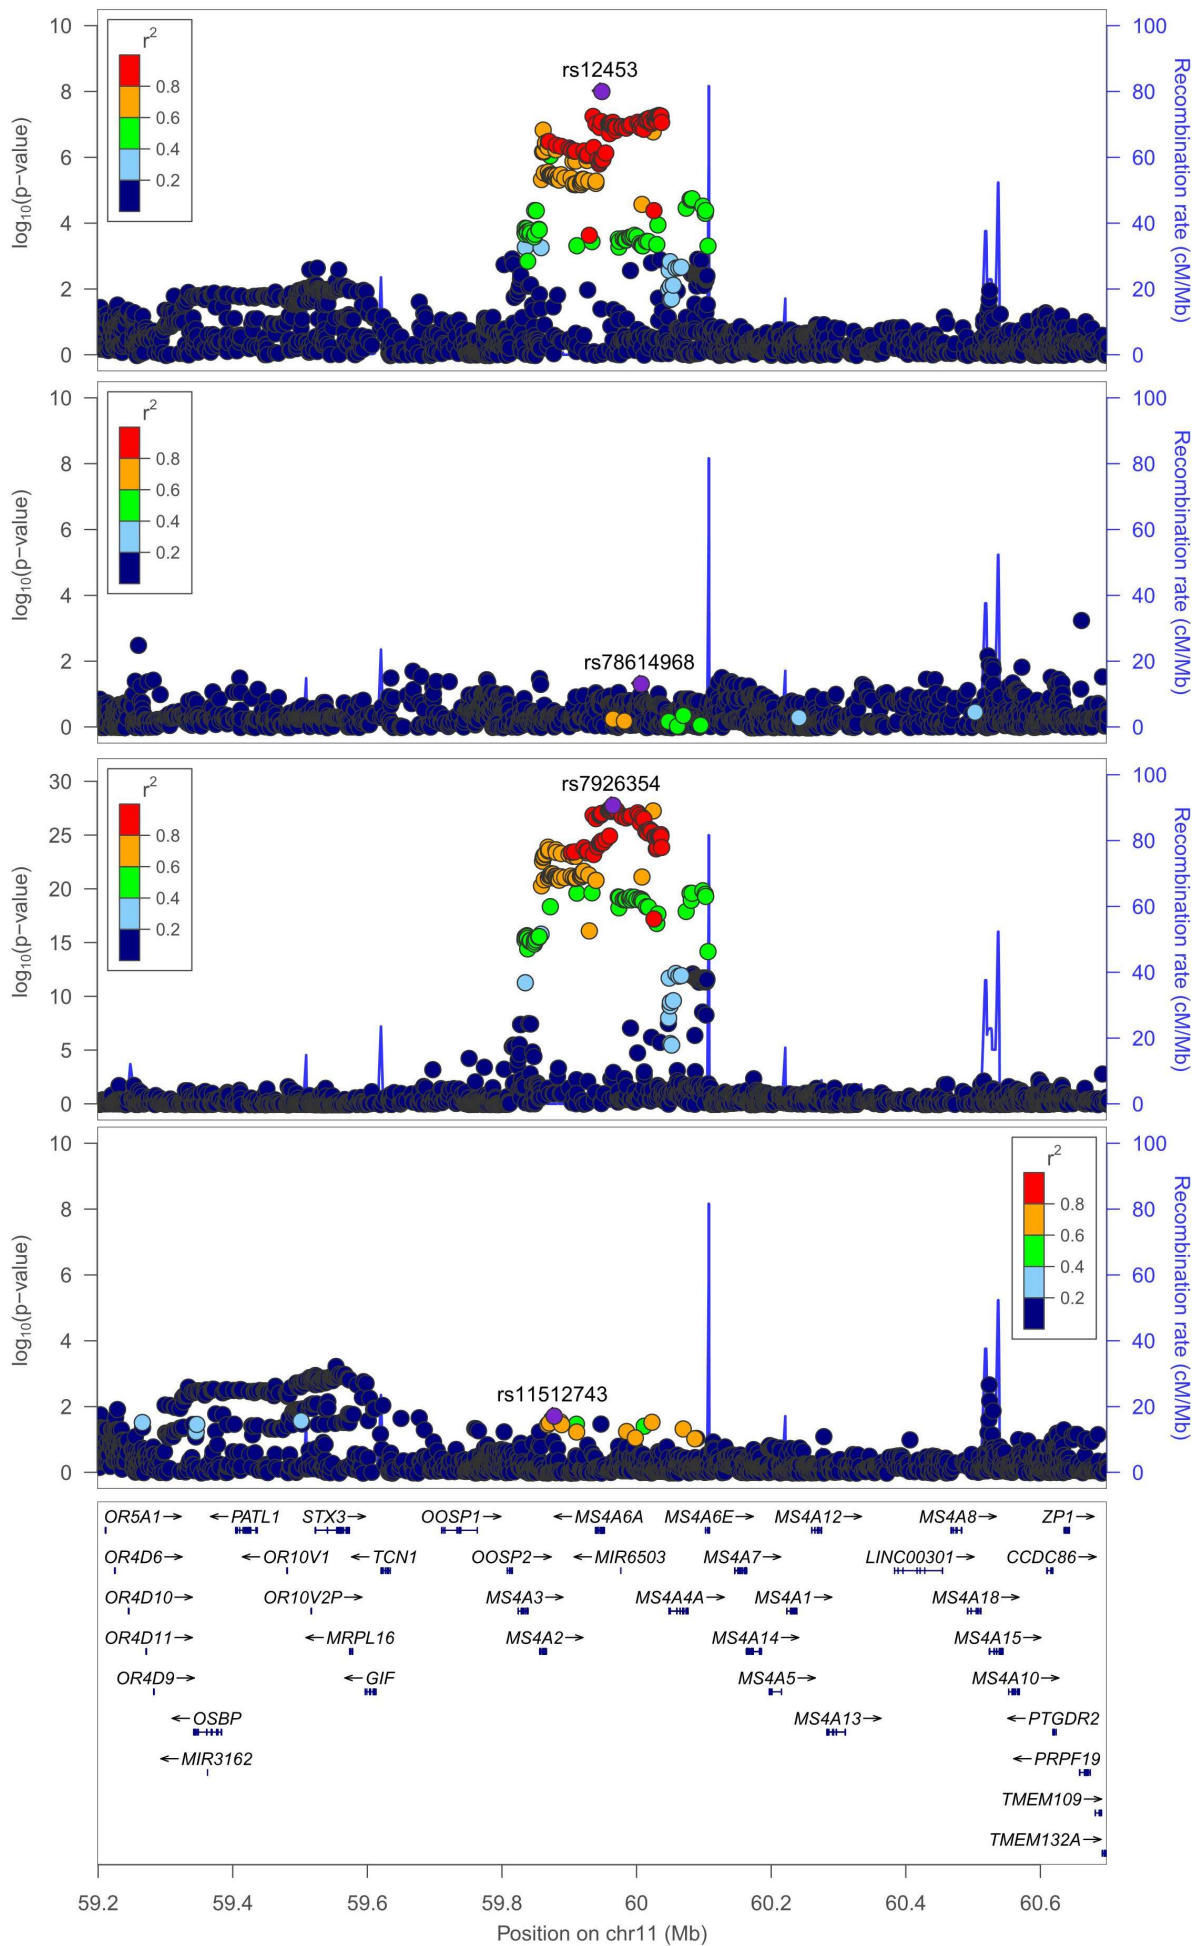

**Fig. S10: The LocusZoom plot of genomic risk loci 11q12.2**

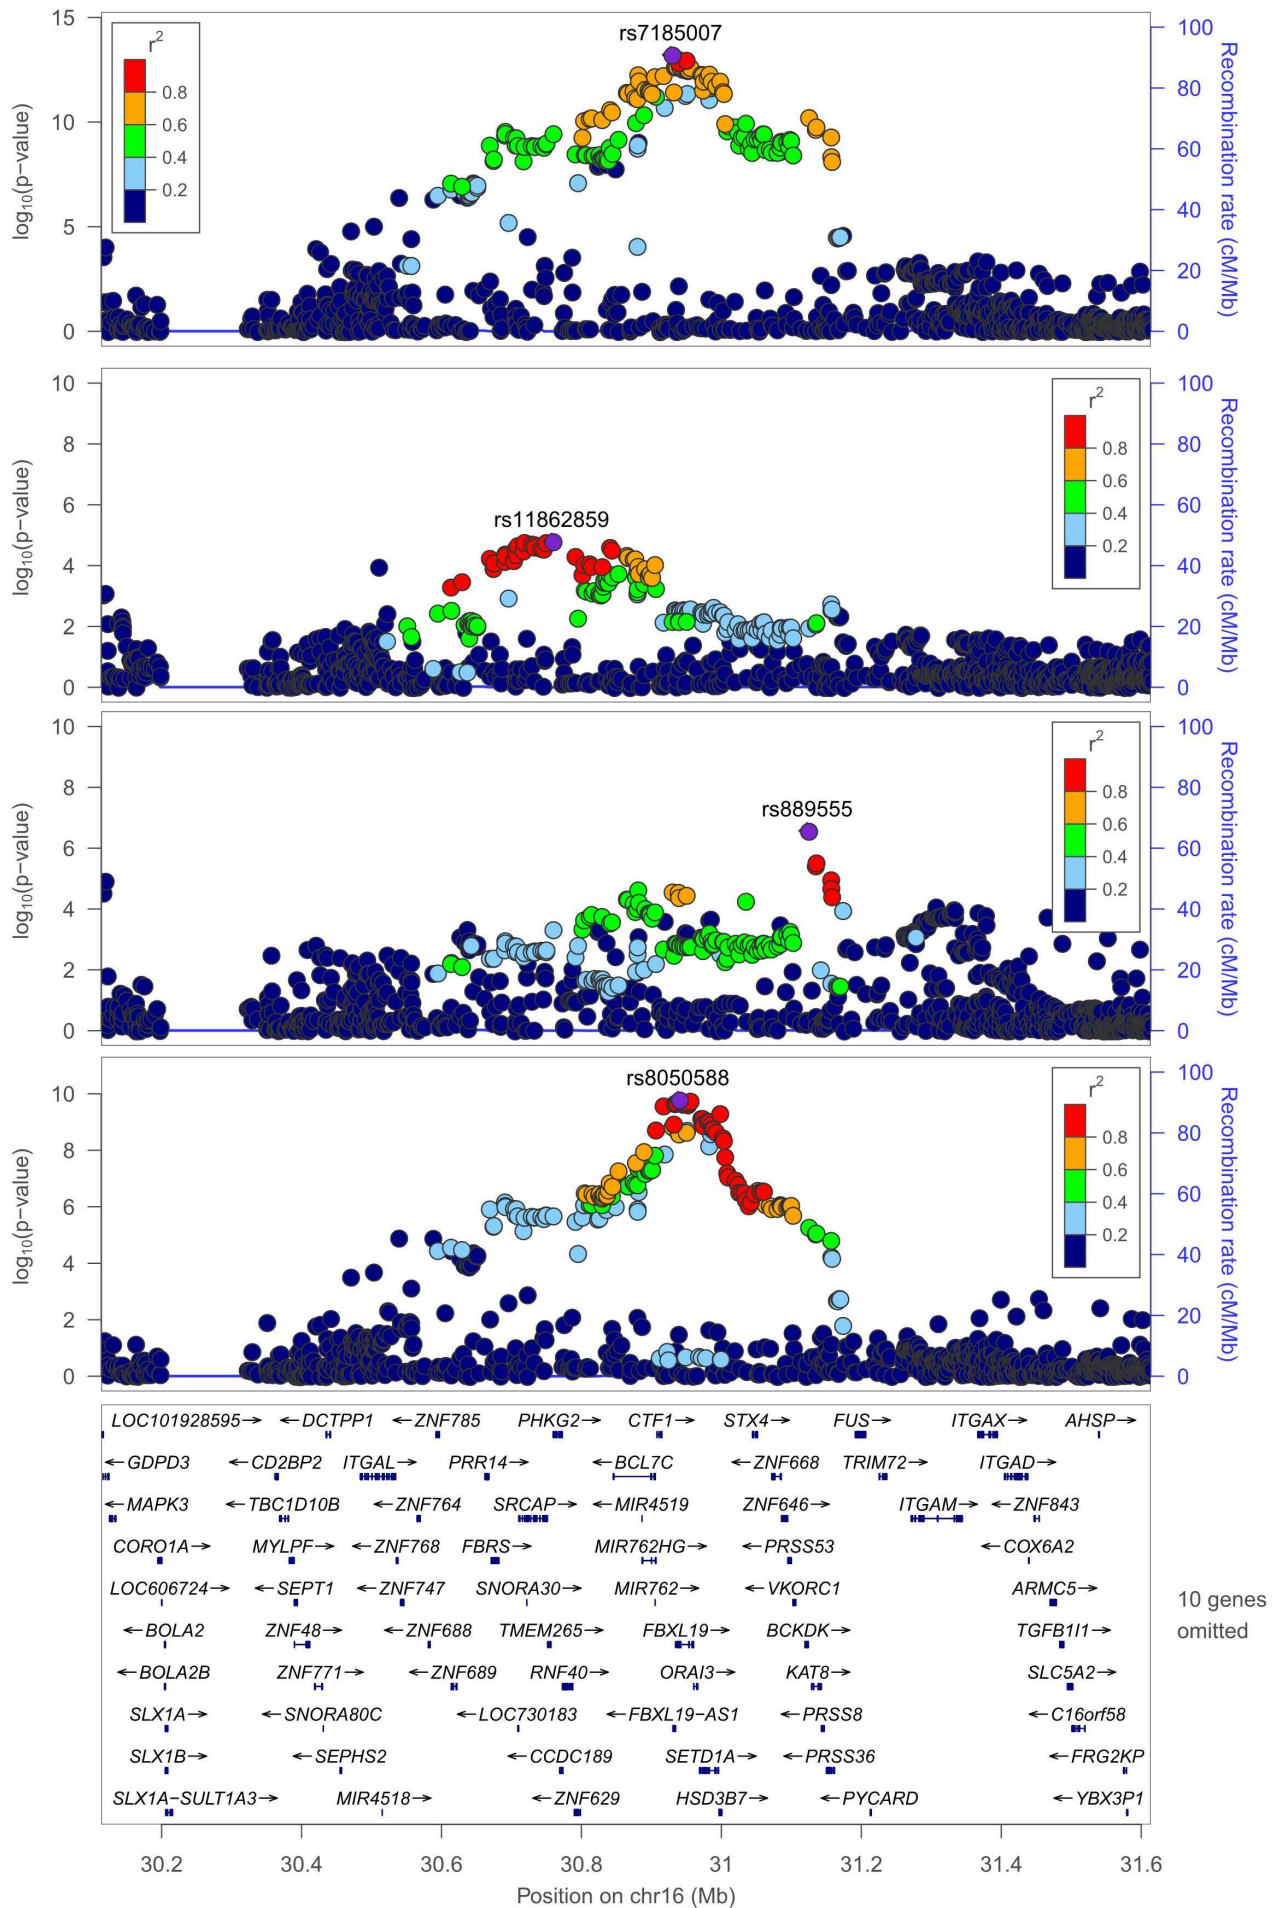

**Fig. S11: The LocusZoom plot of genomic risk loci 16p11.2**



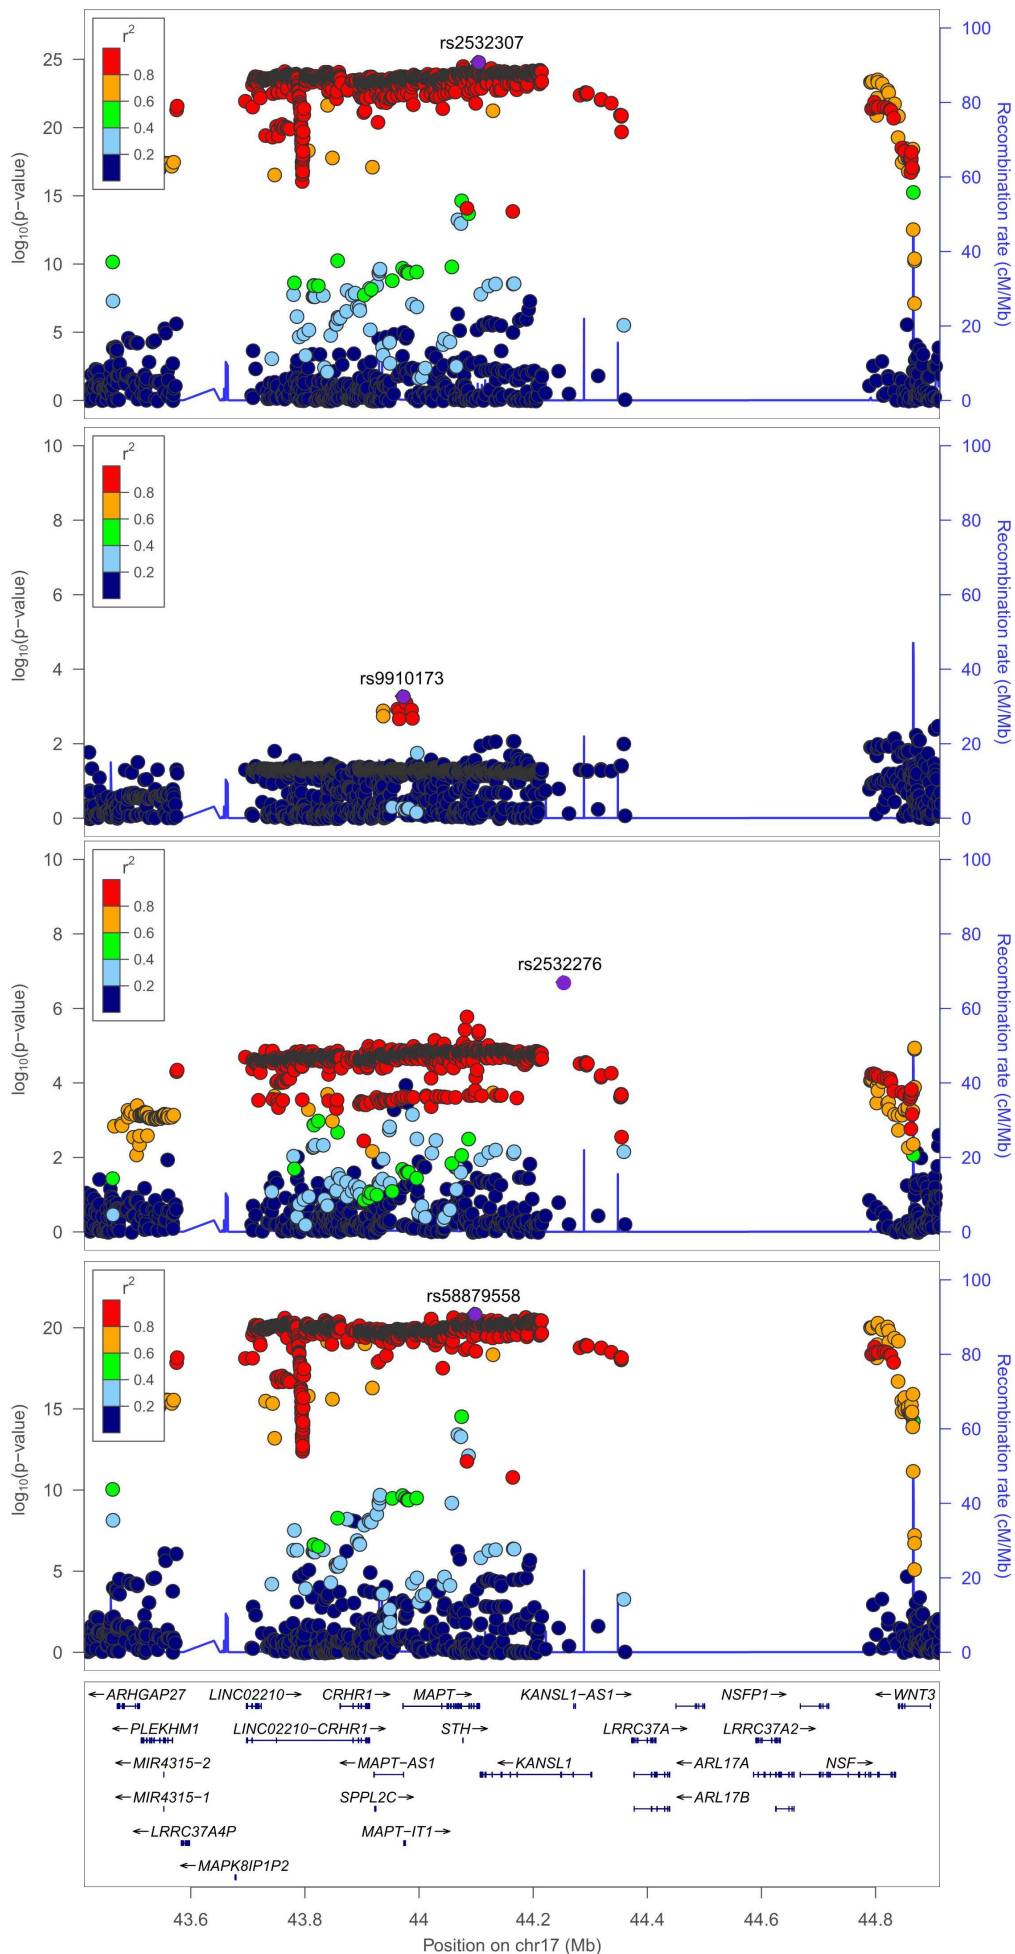

**Fig. S12: The LocusZoom plot of genomic risk loci 17q21.31**

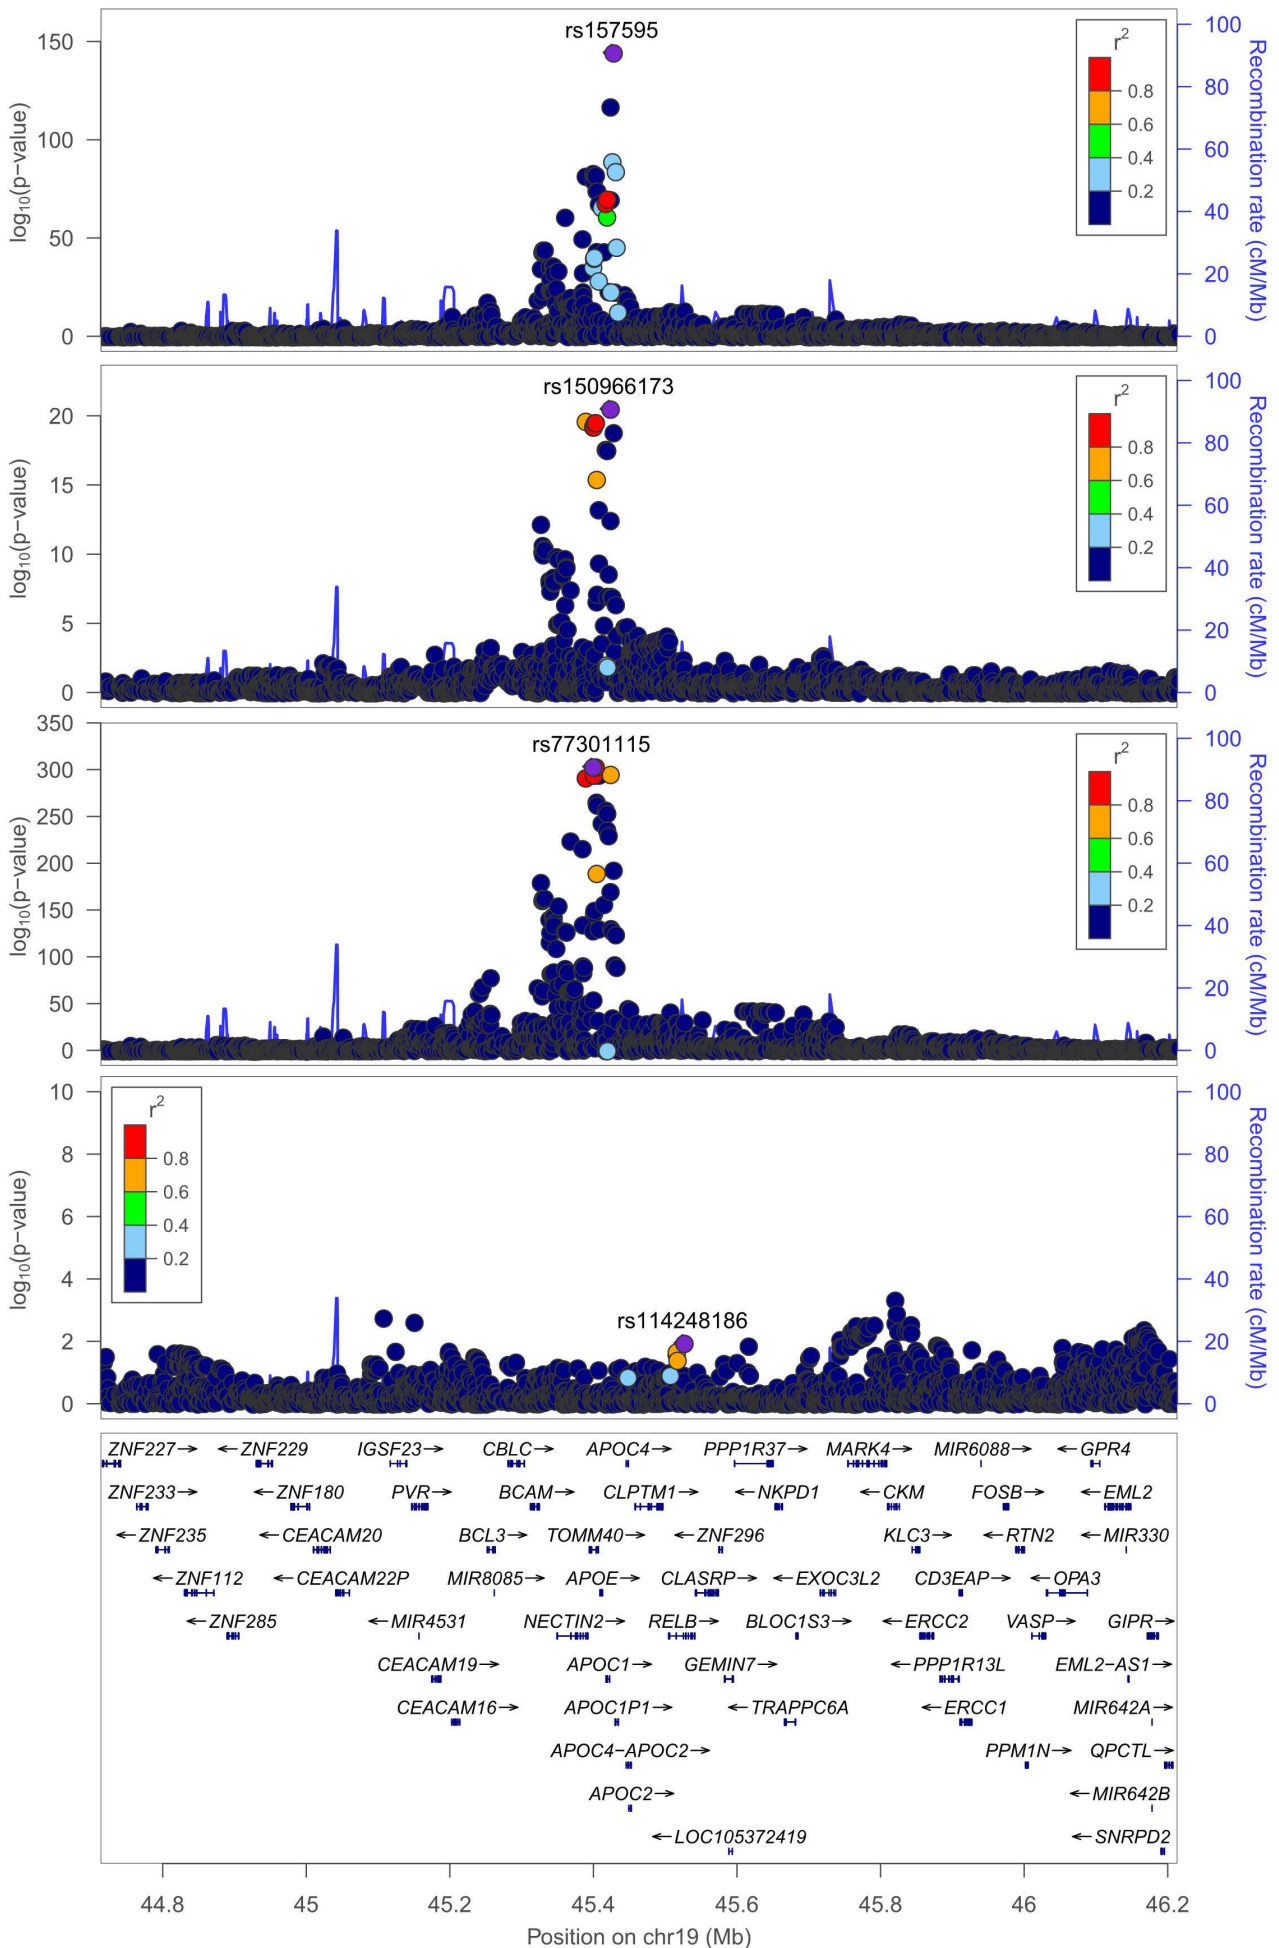

**Fig. S13: The LocusZoom plot of genomic risk loci 19q13.32**
